# Supplementary material for: Ruthenium(ii) and rhodium(iii) porphyrin phosphine complexes: influence of substitution pattern on structure and electronic properties
Source: Royal Society of Chemistry journal article supplement (doi:10.1039/c1nj20598f), 2011-01-01
Supplement: c1nj20598f.pdf [file c1nj20598f.pdf]

Electronic supporting information

# Ruthenium(II) and rhodium (III) porphyrin phosphine complexes: influence of substitution pattern on structure and electronic properties

Andrew D. Bond, Jeremy K. M. Sanders and Eugen Stulz

10

15

**Fig. S1** UV-vis spectra of the porphyrin complexes.  $c = 5 \times 10^{-6}$  M in DCM; porphyrin : phosphine = 1 : 2.

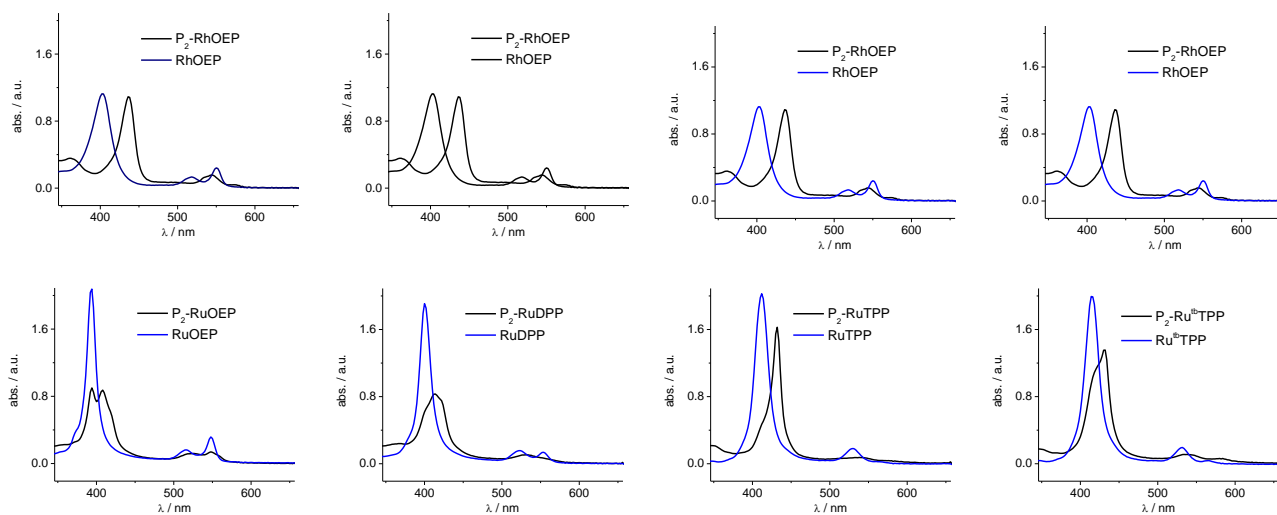

**Fig. S2** Deconvolution of the B-band absorbances of the porphyrin complexes for the determination of the association constants. DCM; porphyrin : phosphine = 1 : 1. Black curves are measured absorbances, green curves are fitted absorbances, red curves are superpositions of the calculated green absorbances.

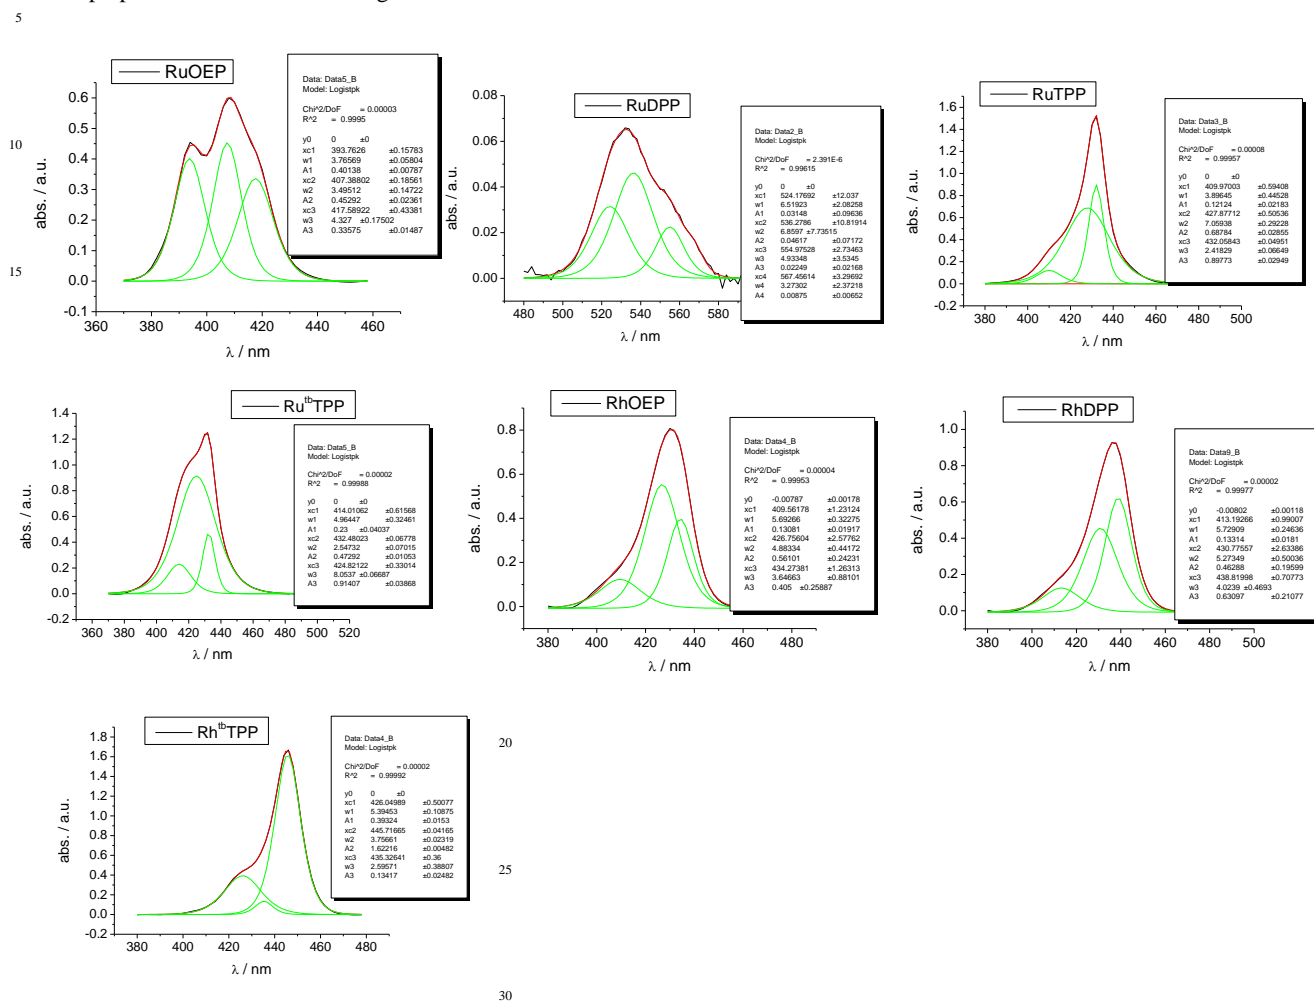

|         | absorbance |       |                    | % composition |          |                    | conc total          | conc complex |            |                    | K <sub>1</sub>      | K <sub>2</sub>      |
|---------|------------|-------|--------------------|---------------|----------|--------------------|---------------------|--------------|------------|--------------------|---------------------|---------------------|
|         | por        | por-P | por-P <sub>2</sub> | por           | por-P    | por-P <sub>2</sub> | mol·L <sup>-1</sup> | por          | por-P      | por-P <sub>2</sub> | L×mol <sup>-1</sup> | L×mol <sup>-1</sup> |
| RhOEP   | 0.123      | 0.552 | 0.395              | 11.49533      | 51.58879 | 36.91589           | 1E-6                | 1.14953E-7   | 5.15888E-7 | 3.69159E-7         | 1.95201E7           | 4.8216E5            |
| RhDPP   | 0.125      | 0.454 | 0.616              | 10.46025      | 37.99163 | 51.54812           | 1E-6                | 1.04603E-7   | 3.79916E-7 | 5.15481E-7         | 1.7361E7            | 8.37505E5           |
| RhdTPP  | 0.39       | 0.133 | 1.61               | 18.28411      | 6.23535  | 75.48054           | 1E-6                | 1.82841E-7   | 6.23535E-8 | 7.54805E-7         | 9.32574E5           | 6.24741E6           |
| --      | --         | --    | --                 | --            | --       | --                 | --                  | --           | --         | --                 | --                  | --                  |
| RuOEP   | 0.401      | 0.453 | 0.336              | 33.69748      | 38.06723 | 28.23529           | 5E-6                | 1.68487E-6   | 1.90336E-6 | 1.41176E-6         | 3.3524E5            | 9.16086E4           |
| RuDPP   | 0.453      | 0.358 | 0.598              | 32.15046      | 25.40809 | 42.44145           | 5E-6                | 1.60752E-6   | 1.2704E-6  | 2.12207E-6         | 2.45809E5           | 1.91348E5           |
| RuTPP   | 0.121      | 0.682 | 0.897              | 7.11765       | 40.11765 | 52.76471           | 1E-6                | 7.11765E-8   | 4.01176E-7 | 5.27647E-7         | 3.95943E7           | 8.22636E5           |
| RudtTPP | 0.23       | 0.914 | 0.462              | 14.3213       | 56.91158 | 28.76712           | 1E-6                | 1.43213E-7   | 5.69116E-7 | 2.87671E-7         | 1.38741E7           | 3.53257E5           |
